# Supplementary figures and images for: Glioblastoma stem-like cells secrete the pro-angiogenic VEGF-A factor in extracellular vesicles
Source: PubMed Central journal article supplement — J Extracell Vesicles. 2017 Aug 8;6(1):1359479. doi: 10.1080/20013078.2017.1359479 (PMC5549846; doi:10.1080/20013078.2017.1359479), 2017-08-08

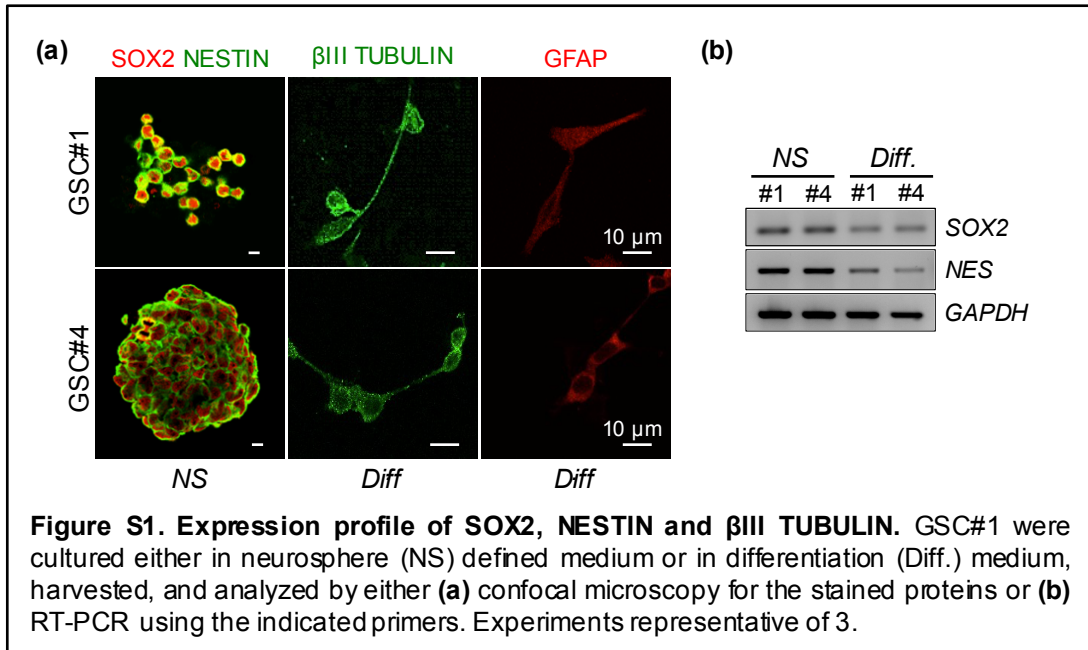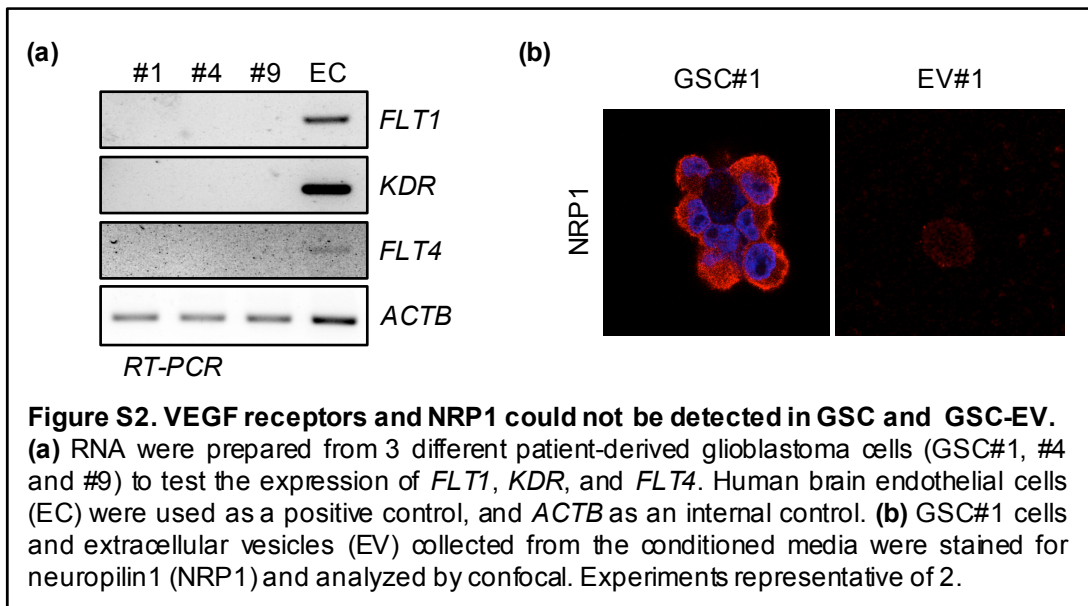

Supplement: zjev_a_1359479_sm1032.pdf [file zjev_a_1359479_sm1032.pdf]
